# Supplementary material
Source: Springer Nature journal article supplement (https://www.springermedizin.de/resource/supplementary/12893_2006_81_MOESM6_ESM.pdf/9512884)

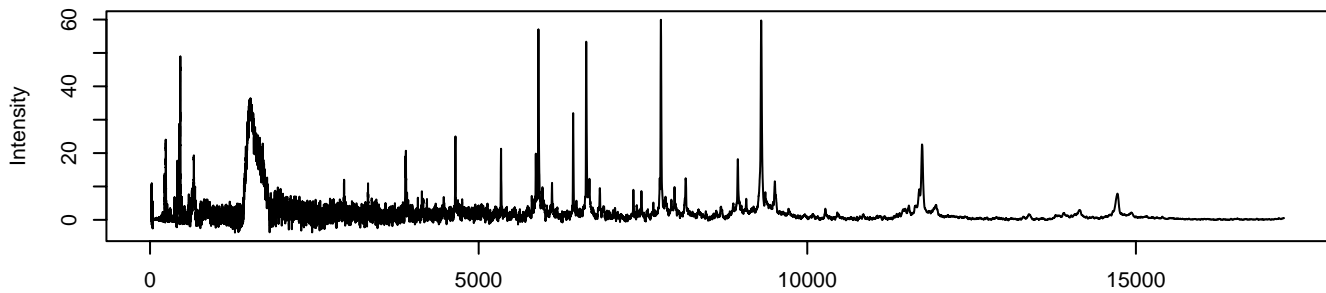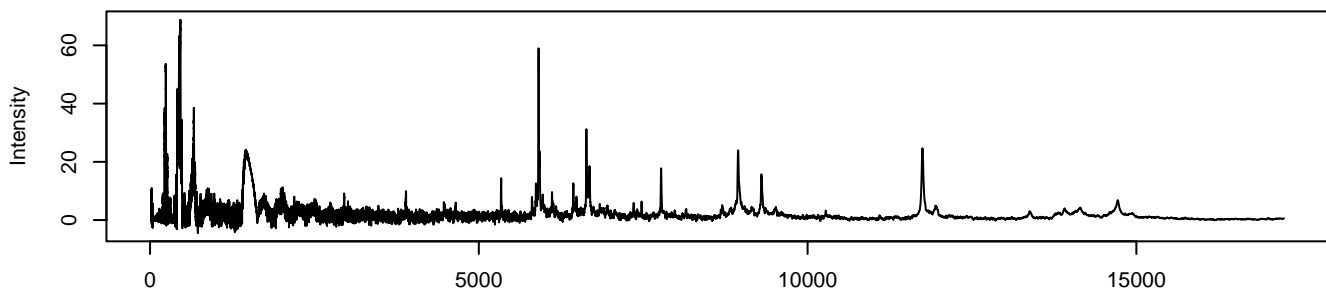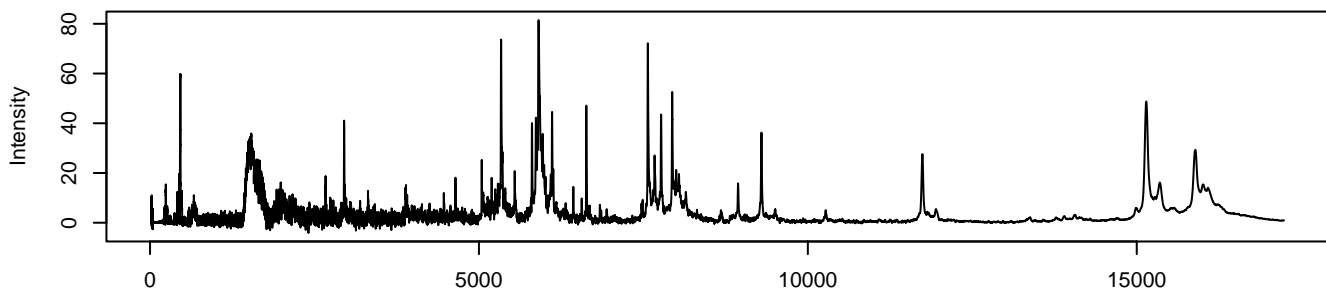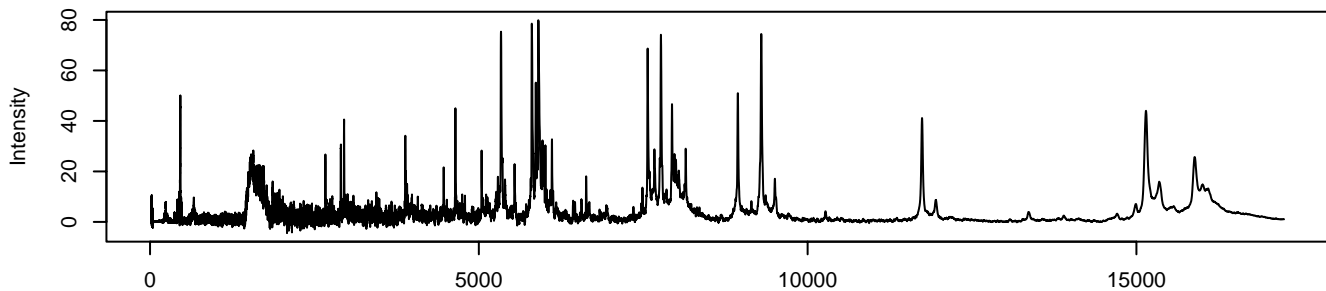

Supplement: MOESM6 [file 9512884]
